# Supplementary material for: Recovery of Extracellular Polymeric Substances from Excess Sludge Using High-Flux Electrospun Nanofiber Membranes
Source: MDPI journal article supplement (doi:10.3390/membranes13010074), 2023-01-07
Supplement: s1 [file s1]

# Supplementary Material: Recovery of Extracellular Polymeric Substances from Excess Sludge Using High-Flux Electrospun Nanofiber Membranes

Da-Qi Cao <sup>1,\*</sup>, Xiao-Dan Liu <sup>1,†</sup>, Jia-Lin Han <sup>1,†</sup>, Wen-Yu Zhang <sup>2</sup>, Xiao-Di Hao <sup>1</sup>, Eiji Iritani <sup>3</sup> and Nobuyuki Katagiri <sup>4</sup>

- <sup>1</sup> Sino-Dutch R&D Centre for Future Wastewater Treatment Technologies/Key Laboratory of Urban Stormwater System and Water Environment, Beijing University of Civil Engineering and Architecture, Beijing 100044, China  
<sup>2</sup> Institute of Soil Environment and Pollution Remediation, Beijing Municipal Research Institute of Environmental Protection, Beijing 100037, China  
<sup>3</sup> Department of Chemical Engineering, Nagoya University, Furo-cho, Chikusa-ku, Nagoya 464-8603, Japan  
<sup>4</sup> Department of Environmental Technology, Meijo University, 1-501 Shiogamaguchi, Tempaku-ku, Nagoya 468-8502, Japan  
\* Correspondence: caodaqi18@163.com or caodaqi@bucea.edu.cn; Tel.: +86-10-6832-2123  
† These authors contributed equally to this work.

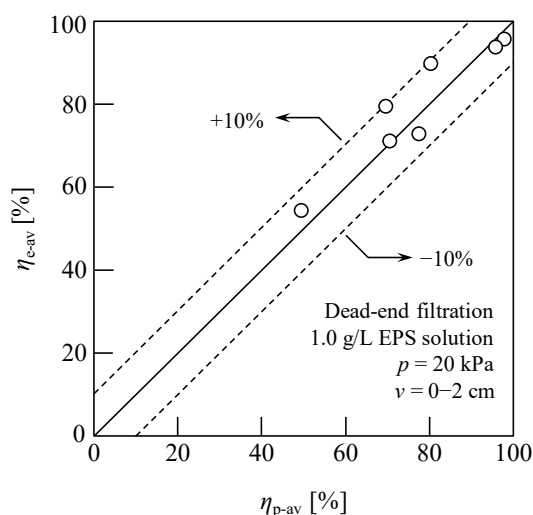

**Figure S1.** Average EPS recovery rates obtained via the UV method ( $\eta_{p-av}$ ) compared with those obtained via the weighing method ( $\eta_{e-av}$ ), wherein the evaluated data were based on for the cumulative filtrate volume per unit membrane area,  $v = 2$  cm.

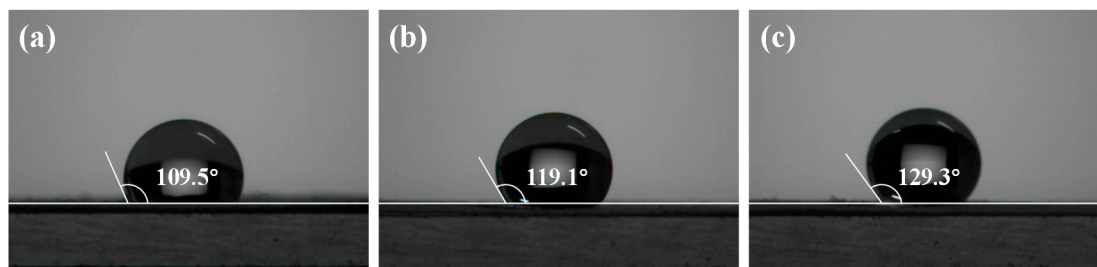

**Figure. S2.** Typical images of the water contact angles of the ENMs prepared using PVDF at different mass fractions of (a) 14 wt%, (b) 18 wt%, and (c) 22 wt%.

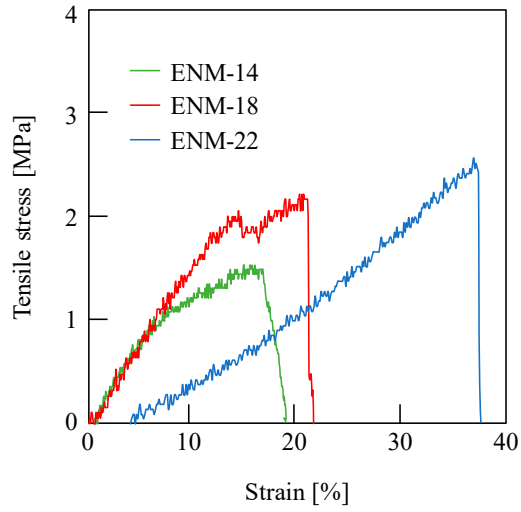

**Figure S3.** Tensile stress–strain curves of the fabricated ENMs.

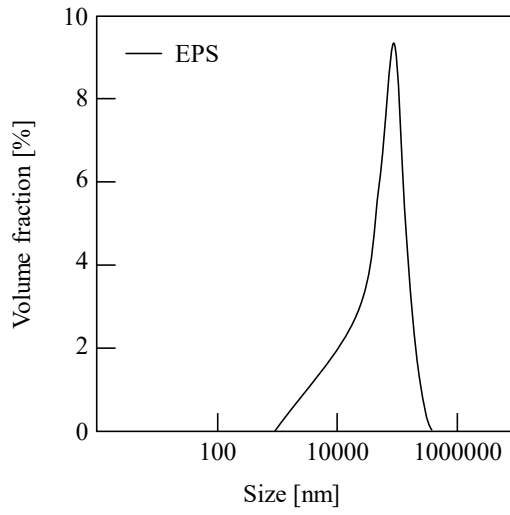

**Figure S4.** Typical size distributions of the colloids present in the EPS solutions.

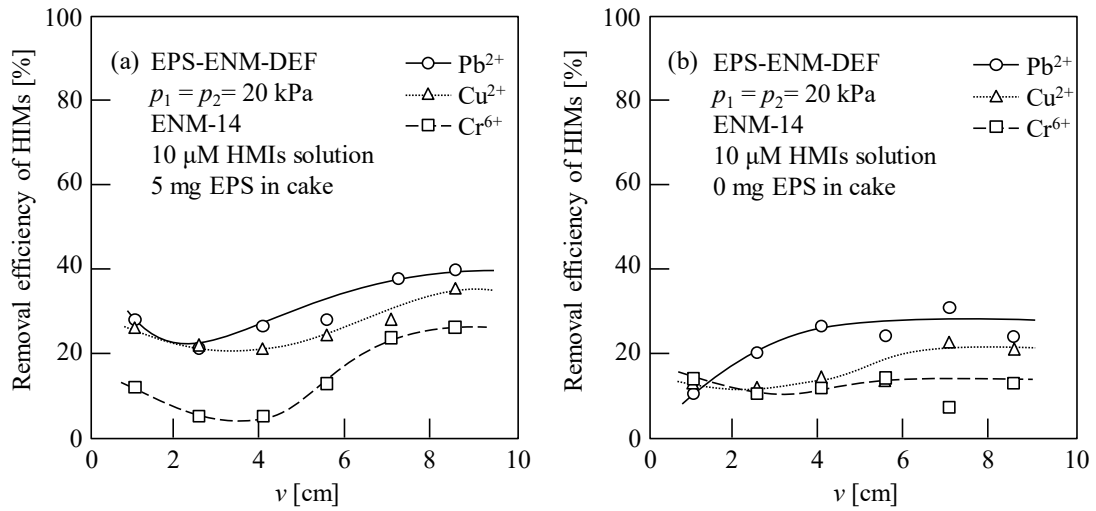

**Figure S5.** HIM removal efficiencies during the EPS-ENM-DEF process on ENM-14 for (a) 5 mg and (b) 0 mg EPS filter cakes. 1st stage: Concentration and recovery filtration of 0.1 and 0 g/L EPS solutions (50 mL) at  $p_1 = 20$  kPa to give EPS filter cakes with masses of 5 and 0 mg, respectively. 2nd stage: Filtration of 10  $\mu$ M solutions (180 mL) of the desired HIM ( $\text{Pb}^{2+}$ ,  $\text{Cu}^{2+}$ , or  $\text{Cr}^{6+}$ , pH 6.2–6.7) at  $p_2 = 20$  kPa.  $v$  is the cumulative filtrate volume per unit membrane area.
